# Supplementary material for: Sequential monitoring of lymphocyte subsets and of T-and-B cell neogenesis indexes to identify time-varying immunologic profiles in relation to graft-versus-host disease and relapse after allogeneic stem cell transplantation
Source: PLoS One. 2017 Apr 11;12(4):e0175337. doi: 10.1371/journal.pone.0175337 (PMC5388479; doi:10.1371/journal.pone.0175337)
Supplement: S1 Minimal Dataset — (XLS) [file pone.0175337.s001.xls]

## Sheet: Foglio1
pts	cd4_d28	cd4_n_d28	cd4_cm_d28	cd4_em_d28	cd4_temra_d28	rte_d28	treg_d28	treg_n_d28	treg_cm_d28	treg_em_d28	cd8_d28	cd8_n_d28	cd8_cm_d28	cd8_em_d28	cd8_temra_d28	cd19_d28	cd19_imm_d28	cd19_mat_d28	cd19_mat_n_d28	cd19_mat_unsw_d28	cd19_mat_sw_d28	cd19_mat_dn_d28	cd4_d90	cd4_n_d90	cd4_cm_d90	cd4_em_d90	cd4_temra_d90	rte_d90	treg_90	treg_n_d90	treg_cm_90	treg_em_90	cd8_90	cd8_n_d90	cd8_cm_d90	cd8_em_d90	cd8_temra_d90	cd19_d90	cd19_imm_d90	cd19_mat_d90	cd19_mat_n_d90	cd19_mat_unsw_d90	cd19_mat_sw_d90	cd19_mat_dn_d90	cd4_180	cd4_n_d180	cd4_cm_d180	cd4_em_d180	cd4_temra_d180
pt1	71.2	9	30.2	26.4	2.2	5	11.2	2	3	6.4	26.1	4.2	3	17.4	2.8	2.1	1	1	0	0	1.3	0	88.3	6.7	16.7	58.2	6.7	5.2	15.2	0	3.2	9.2	135.2	10.4	15.2	10.4	102.1	0	0	0	0	0	0	0	345.2	1.3	23.4	296.3	24.2
pt2	4.2	0	1	0	4.2	0	0	0	0	0	1	0	0	0	0	0	0	0	0	0	0	0	79.8	5	34.1	6	0	6	49	0	45	4	49	1	4	40	5	51.2	41.2	10	2.1	0.3	3.2	4.2	68	22	3.5	8.2	35.4
pt3	1	0.1	0.5	0.8	0	0	0.1	0.1	0	0	0.9	0	0	0.6	0.2	7.8	7.4	0.4	0.2	0	0.1	0.2	82.4	0.7	28.2	51.9	1.5	0.2	3.7	1	1.4	1.4	80.9	1.7	7.2	51.1	20.9	31	8.1	23	19	0.2	2.5	1	63	1.2	27.6	29.4	4.7
pt4	503	164.5	253.9	78.8	4.4	115.4	27.4	6.2	17.1	4.1	104.6	11.9	10	43.1	39.5	2	1	1.4	1	0	0	0	381.6	128.7	182.1	63.9	4.3	90.4	18.2	5.5	9.7	3	123.3	17.3	8	45.3	52.6	22.8	12	11	7	0.1	2.9	1	61.2	15.8	31.2	15.7	0.8
pt5	98	7.2	20.3	71.2	0	4	7	1.8	1.8	3.6	47	2	2.8	32.3	9.2	1.8	0	1.8	0	1	0	1	104	1.3	52.4	48.2	2.1	0	6.2	0	1.5	4.2	547	3.2	27.1	306	211	15.4	0	15.5	13.7	0	0	1.6	264	0	56.4	198	9.7
pt6	83	8.1	25.1	50.2	1.8	1	6.4	0	4.6	1.8	36.2	4	0	21.2	6.2	5.3	1.3	4.2	1.2	0	1.8	1.4	153.8	4.2	128.9	43.2	4	0	2	1.4	0	0	78.2	91	1.2	65.2	4.6	3	0	2.7	0	1.7	0.4	0.5	49	7.4	2.1	38.7	1
pt7	0	0	0	0	0	0	0	0	0	0	0	0	0	0	0	0	0	0	0	0	0	0	4	0	2.2	1.7	0	0	0	0	0	0	0	0	0	1	0	0	0	0	0	0	0	0	35	12.4	16.5	7.1	0
pt8	27	1.7	8.4	16	1	1	2	0	1	1	77.1	21	5.4	39.2	11.5	0	0	0	0	0	0	0	225.2	2.9	112.6	96.4	13.4	1	17.4	1	5.4	10.7	800.7	67.3	46.9	186.3	500.1	18.9	11	10.1	6.8	0	1	1.7	224	2.9	112.6	96.4	13.4
pt9	1173.6	37.7	114.1	986.4	35.3	26.2	16.7	1.9	9.1	5.4	1108	37	7.1	261.8	803	0	0	0	0	0	0	0	663	71.7	147.6	415	28	45.7	26.5	2.6	13.2	10.6	768.1	73.4	28.7	171	495	17.7	3	14.7	12.6	0	0	2	551.6	61.5	177.7	297.1	15.3
pt10	44.3	9.2	13.2	12.2	3.8	2.2	6.2	0	2.7	3.8	26.1	6.2	1.8	14.2	4.3	0	0	3	2.1	0	0	1.3	45.4	13.2	17.2	16	0	1.2	7.2	3.2	0	4.2	64.2	1.2	4.6	23.2	47.2	1	0	1.5	1.3	0	0.2	0	181.7	2.1	123.4	54.5	2.5
pt11	22.1	0	6.3	16.2	0	0	1	0	0	1	27.2	1.8	0	20.8	4.8	4.2	2.3	2.1	0	0	1.4	1.2	0	0	0	0	0	3.8	9	0	0	8.5	41.4	6.2	0	8.4	28.7	18.4	7.4	11.4	7.5	0.6	1.2	1.2	129.8	30.5	74.3	5	20.2
pt12	90	8.3	27.5	45.4	8.6	5.2	10.2	0	6.8	4.4	25.2	5.1	2.2	17.2	4.8	0	0	0	0	0	0	0	63	1.3	25.6	37.2	0	3.1	0	0	0	0	122.2	1.3	2.1	75.4	46.2	1.3	0	1.4	0	1.2	0	0	312	11.2	170.2	121.7	9.6
pt13	181.4	1	47.3	131.6	2.6	0	2.8	0	1	2	63	1.6	3.5	21	14.5	1.6	0.1	0	0	0	0	0	107.3	1	41.1	58.9	6.6	0.4	7.5	0	2.2	4.4	241.2	4.6	23.5	105.1	108	21.4	6.1	15.3	8.3	0.7	2.7	3.1	506	39.7	158.9	208.9	98.8
pt14	70.3	1	25.4	44.7	0	0	9.4	0	6.2	3.4	44.2	7.2	7.9	26.2	2.9	0	0	0	0	0	0	0	37.9	1	14.4	22.3	1	0	3.5	0	1.4	1.9	106.9	5.5	6.9	51	43.5	0	0	0	0	0	0	0	121.2	2.1	60.8	58.2	1
pt15	255.8	43.3	94.8	110.1	8.3	25.4	19.1	0.6	10.5	8	214.7	17	11.5	136.6	49.6	5.2	0	5	1.4	1	1.7	1	27.1	7.9	11.1	5.6	2.3	3.4	2.3	0	1.3	1	36.4	2.4	0	11.3	22.1	3	0.1	2.9	1.9	0.5	0.3	0.2	47.5	1.5	21.3	25.3	0.2
pt16	73.2	10.2	31	28.4	1.7	6.2	8.4	2.1	2.7	4.2	39.3	4.8	1.8	28.2	5.8	4.1	0	4.2	3.4	0	1.2	0	93.7	7.2	9.2	70.2	7.1	9.1	0	0	0	0	49.3	4.3	0	1	45.8	5.4	1.4	4	0	0.2	1.4	2.3	349.5	34.3	101.2	177	37
pt17	95	7.8	24.3	64.4	0	4.5	11	3.6	5.4	2.5	40.2	4.4	3.4	25.7	6.7	5.1	2.2	3.2	0	1.3	2.1	0	140	0	42.5	96.1	1.4	0	13.2	0	8.2	5.3	110.2	18	7.4	31.7	54.3	42.4	0	42.8	37.2	0	0	5.6	266	10.4	127.3	86.4	43.8
pt18	16.6	0	1.3	15.7	0	0	1	0	0	1	13.5	0	0	7.8	5.5	0	0	0	0	0	0	0	61.9	0	12.5	47.1	1.9	0	5.2	0	1	3.8	96.2	1.7	10.3	88.7	26.6	0	0	0	0	0	0	0	129.2	2.1	27.5	95.1	4.6
pt19	101	8.3	49.7	37.4	4.9	5.7	6.4	1	2.6	3.2	24.4	2.4	1.7	18.7	1.8	0	0	0	0	0	0	0	221.4	6.7	40	163.5	13.2	4.9	8.5	1	4.3	3.5	120.7	3	1.1	51.2	65.4	5	4.7	0	0	0	0	0	362.8	11.8	131.7	201.1	19.6
pt20	9.1	1	8.1	0	0	0	1	0	1.2	0	22	0	0	17.8	4.2	1	0	1	0	0	0	1.4	54	0	0	51.1	3.1	0	6	0	0	5.7	130.3	0	0	0	130.7	4	0	4.2	0	0.2	2.2	1.4	194	59.2	75.6	59.7	0
pt21	67	6.8	22.1	38.7	1.2	2.2	7.2	1.4	3.5	3	50.2	8.2	4.2	30.1	7.7	1	0	1.5	0	1.4	0	0	130	0.8	41.2	86.1	2	0	1	1	0	0	193.2	4.8	12.2	177.4	0	0	0	0	0	0	0	0	136	13.2	60.2	61.4	2.3
pt22	21.5	1	8.5	12.2	0	0	2.8	0	1	2.1	44.7	5.2	1.1	31.5	7	0	0	0	0	0	0	0	82.2	2.6	37.3	40.4	2	2.1	6.4	0	1.2	4.9	170.4	7.7	6.7	116.8	39.1	23.9	10	13.7	10.3	0	1.2	2	137.4	43.9	63.4	29.5	1
pt23	28.4	1.3	10.4	16.7	1.5	1	1.9	0	0	1	29.8	1.4	2.7	20.7	5.1	1	1	0	0	0	0	0	38.3	2	13.1	22	1.2	1.3	3	0	1	1.7	19.5	5.7	4.4	6.5	2.9	32.5	0	32.5	27.4	1.2	2.7	1	30.2	4.5	13.6	11.3	1
pt24	112	9.4	18.7	82.4	3.3	5.3	5.8	2.8	2.2	1	38.3	3.2	1.8	22.2	11.1	3.8	0	4.3	1.1	0	1.7	1.5	22	3.7	10.2	0	8.1	0	5	0	0	5.2	62.5	0	2.6	60.2	0	6	6.2	2	0	0.4	1.3	0	381	26.7	123.5	230.5	0.3
pt25	159.2	1.1	43	113.8	1.3	0	17.2	0	2.9	13.9	191.4	15.4	21.2	75	79.8	11	0	10.8	8.8	0	1	1	49.3	1	11.1	36.2	2.2	0.2	3.7	0	1	2.4	98.9	5.6	1	21.3	71.1	1	0	1	0	0	0	1	484.2	5.2	156.7	304.4	18.4
pt26	24.5	0	8.4	14.9	0	0	1	0	0	1	42.7	7.3	1.7	27.4	6.3	0	0	0	0	0	0	0	69	1.3	21.4	44.7	1.6	0	2.5	0	0	2	133.4	21.5	19.8	67	25	14.3	5.9	9.2	7	0	1	1	146.4	13.2	68.4	62.7	1.9
pt27	13.4	0	4.2	9.2	0	0	1	0	0	1	25.4	1	1.2	21.1	2.1	2.1	1.4	1	0	0	1	0	73.1	0	38.3	35.1	0	0	4.5	0	0	4.1	52.2	0	6.8	45.2	0	14	0	14	6.8	2.1	4.3	0.5	338	20.2	96.8	221	1.5
pt28	6.7	1.5	2.6	2.1	1	1	1.4	1	0	0	19.3	1.8	0	8.8	8.5	0	0	0	0	0	0	0	141.9	7.2	35.9	57.4	41.4	4.3	7.1	1	2.1	3.6	408.5	9.9	4.8	123.5	270.3	47.6	29.1	18.8	15.5	0	0	2.8	209.8	0	137.1	67.4	5.3
pt29	21.5	0	5.7	15.8	0	0	4.7	0	1	3.9	13.6	2.2	0	7.8	3	2.4	0	2.3	1.1	0	0	1	78.5	0	35.2	41.7	1	0	6.5	0	1.6	4.8	101.2	11.7	7.6	30.3	51.6	16.2	5.9	10.2	7.5	0	1.4	1.2	169.8	11.3	70.5	74.3	14.8
pt30	108.6	0	25.8	82.3	1	0	10.5	0	2.5	8	90	3.6	3.1	72	11.2	0	0	0	0	0	0	0	39	0	8.8	30	1	0	3.6	0	1	2.2	27.5	2.1	1	14.7	9.9	0	0	0	0	0	0	0
pt31	28.4	1	13	14.8	0	0	12	0	2.6	9	14.7	1.6	2.1	7.5	4.5	1.2	1	0	0	0	0	0	15.2	0	5.3	9.1	0	0	4.1	0	0	3.5	30.5	1	1	13.9	14.8	1.4	0	1.4	0	0	1	0	68.8	1.1	30.8	35	2.6
pt32	176.3	1.7	49.9	122.4	2.3	1.2	9.7	0	2.9	6.5	278.4	9.5	8.2	225.1	35.7	2	0	2.5	0	0	1.4	1	343.1	5.5	87.3	201.5	48.9	2.8	7.3	0	2.4	4.6	776.4	17.2	14.1	355.1	389.9	50.3	7.8	43.1	24.5	1	12.6	4.6	330.7	22.3	126.4	162.5	20.9
pt33	88	8.2	33.4	39.8	6.3	5.7	6.2	0	3.5	2.8	22.3	3.8	4.8	19.2	5.7	1	0	1	0	0	0	1	30.8	11.2	24.5	4.2	3.4	0	5.3	1.2	0.8	3.3	82.3	4.4	0	17.8	45.7	350	121.9	230.8	210.1	1.7	3.7	15.3	220.8	68.9	133.3	17.6	1
pt34	169	1	18.5	130.3	19.7	0	1.6	0	1	1	398	9.7	6.4	259.6	122.4	2.1	0	1.9	0	0	1	0	316.1	1.5	71.4	203.2	39.9	1	16.3	0	5.1	10.8	1058.2	16.2	31.6	470.3	540.2	148.9	60	89.7	73.6	1.9	10.6	3.6	424.5	8.1	110.2	247.3	59
pt35	38.4	10.7	12.7	11.2	2.8	3.9	2.8	0	1	1.7	5	1	1.1	1.1	2	0	0	0	0	0	0	0	30.7	10.5	12.6	9.7	4.5	2.9	2.4	0	1	1	31.9	2.6	1.9	7.1	20.3	1	0	1	0	0	0	0	391.3	61.8	120.6	167.9	41
pt36	153	33.6	85.6	35.7	0	24.4	11.5	4.8	4	2.6	51.2	8.9	4.1	21.2	17	0	0	0	0	0	0	0	225.9	64	107.3	52.2	2.1	49	18.1	7.2	4.7	6.1	37.4	13.4	2.7	9.6	11.7	47	16.3	31.2	24.6	0	4.2	1.9	147.6	64.6	60	20.6	1.5
pt37	47	15.5	18.1	11.5	1	6	6.4	0	2.9	3.1	22.1	2.7	2.3	16	3	1	0	1	0	0	0	0	14.1	6.9	4.1	3.9	0	3.3	1	0	0	0	2.7	1.5	0	1	0	0	0	0	0	0	0	0	55.6	13.6	24.8	15.6	1.4
pt38	43	12.6	15.4	12.7	2.4	9.1	1.7	0	0	1.1	20	7.2	2.1	7.7	6	0	0	0	0	0	0	0	95	13.7	21.4	38.5	26.3	9.1	3.9	0	1.2	2.4	53.6	11.5	2.7	12.4	27	1	0	1	0	0	0	0	189.7	12.3	22.1	107.2	47.7
pt39	10	0	0	10.2	0	0	0	0	0	0	0	0	0	0	0	0	0	0	0	0	0	0	0	0	0	0	0	0	0	0	0	0	0	0	0	0	0	0	0	0	0	0	0	0	4.1	0	1.8	2.2	0
pt40	6	0	2.2	3.7	0	0	0	0	0	0	8.2	1.6	0	2.4	1.7	0	0	0	0	0	0	0	48.4	1	23.1	23.7	1	0	4.5	0	0	3.9	88.2	9.2	10.9	45.7	22.3	32.3	13.4	20	17.3	0	1	1.2	123.5	29.3	53.1	40.3	1.5
pt41	235	58.2	114.3	45.2	20.2	39.7	10.1	1	6.6	2.4	398	18	14.2	260.5	165
pt42	1	0	0	1.1	0	0	0	0	0	0	7.3	0	0	5.2	1.2	0	0	0	0	0	0	0	82.7	1.1	35.1	45	1.5	0	6.3	0	1.5	4.6	148.9	5.9	8.2	79.9	54.9	10.2	6.7	3.6	1.8	0	1.3	0	242.3	21.2	120.8	96.9	3.3
pt43	347	1	29.8	317.7	0	1	10.3	0	3.2	7.1	1138.1	18.2	17.4	668.9	433.7	18.9	6.1	13	11.1	0	1	1	245.5	1	77.7	169.3	1.6	0	19	0	7.8	11.1	1918.3	25.1	62.5	884	946.7	155	65.9	90.6	76.2	1.4	8.5	4.5	253	1.7	87.1	162.4	1.7
pt44	188	14.3	30.3	128.4	16	6.7	4.6	1	2.3	1.5	57	3.1	3	30	20.8	0	0	0	0	0	0	0	85.7	19.7	32.4	23	9.9	9.3	10.2	1	6	2.6	87.2	4.7	4.2	57.4	21	1	0	1	0	0	0	1	148.8	18.8	30.1	92.1	7.5
pt45	38	0	5.4	34.5	0	0	1.6	0	0	1.2	16.1	1	1	20.8	4.9	0	0	0	0	0	0	0	237.4	1.3	53.3	167.3	14.9	0	10	0	2.5	7.3	2082.9	20.8	85.4	1264.3	712.3	27.1	10.4	16.9	16	0	0	0	233.1	1.7	59.3	163.1	8.7
pt46	21.1	0	6.6	14.4	0	0	4	0	1.5	2.5	16.3	0	1	8.8	6.4	0	0	0	0	0	0	0	4.3	0	1.3	2.9	0	0	0	0	0	0	9.8	0	0	3.5	5.8	0	0	0	0	0	0	0	56.9	0	31.5	25.4	0
pt47	267	21	111.4	132.2	2.3	12.8	27	2.3	10.7	8	36.2	85.2	33.9	227.9	78.7	0	0	0	0	0	0	0	209	0	89.8	120	0	0	12.7	0	3.2	8	159.2	8.2	16	58.2	77.6	17.5	12.5	5	4.1	0	0	0.2	61.4	1.2	19.6	39.3	1.7
pt48	17	0	7	10.6	0	0	3.2	0	3.2	0	30.2	3.8	1	25.4	0	1	0	1	1.3	0	0	0	30.1	0	20.2	9.3	0	0	0	0	0	0	302.2	9.4	5.3	99.2	189	8.2	4.2	4.1	2.5	0.7	0.5	0	57.7	45.4	4.1	4	4.2
pt49	12	0	0	12.2	0	0	0	0	0	0	28	0	0	16.4	11.1	1	0	1	0	0	0	1.1	98	0	98.4	0	0	0	5.2	0	0	5	15.4	2	0	8.4	5.3	3.2	0	3	1.7	0	0	1.3	44.5	7.8	23	11.2	3.1
pt50	32	1	16.2	16.5	0	0	1	0	0	1	27	0	0	19.4	6.2	2	1	1.3	0	0	1.4	0	51	1	8.7	43.2	0	0	4	0	0	3.5	21.2	7.5	7.4	1	6.3	22.1	14.1	8.2	7.8	0	0	0	308.8	14.3	156.7	87.4	50.4
[truncated: 47 more columns]
